# Supplementary material for: Chemically engineered alloy anode enabling fully reversible conversion reaction: design of a C–Sn-bonded aerofilm anode
Source: Royal Society of Chemistry journal article supplement (doi:10.1039/d1ta09716d), 2022-01-01
Supplement: d1ta09716d1.pdf [file d1ta09716d1.pdf]

## Supplementary

# Chemically engineered alloy anode enabling fully reversible conversion reaction: Design of C-Sn bonded aerofilm anode

*Sun-Sik Kim,<sup>‡a</sup> Chenrayan Senthil,<sup>‡a</sup> Sung Mi Jung<sup>b</sup> and Hyun Young Jung<sup>\*ac</sup>*

<sup>a</sup> Department of Energy Engineering, Gyeongsang National University, Jinju-si, Gyeongnam 52725, South Korea

<sup>b</sup> Environmental Fate & Exposure Research Group, Korea Institute of Toxicology, Jinju-si, Gyeongnam 52834, South Korea

<sup>c</sup> Future Convergence Technology Research Institute, Gyeongsang National University, Jinju-si, Gyeongnam 52725, South Korea

\* To whom correspondence should be addressed. E-mail: [hyjung@gnu.ac.kr](mailto:hyjung@gnu.ac.kr) (Prof. H.Y. Jung)

‡ Authors equally contributed

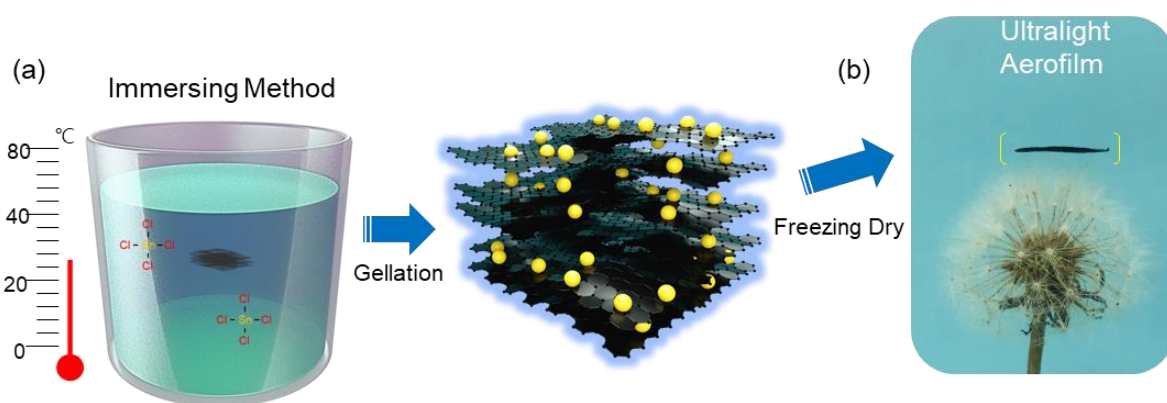

**Fig. S1.** (a) Formation of C-Sn bonded aerofilm anode by a simple immersion technique. (b)

Ultralight nature of aerofilm anode placed over a dandelion flower.

Spot 1

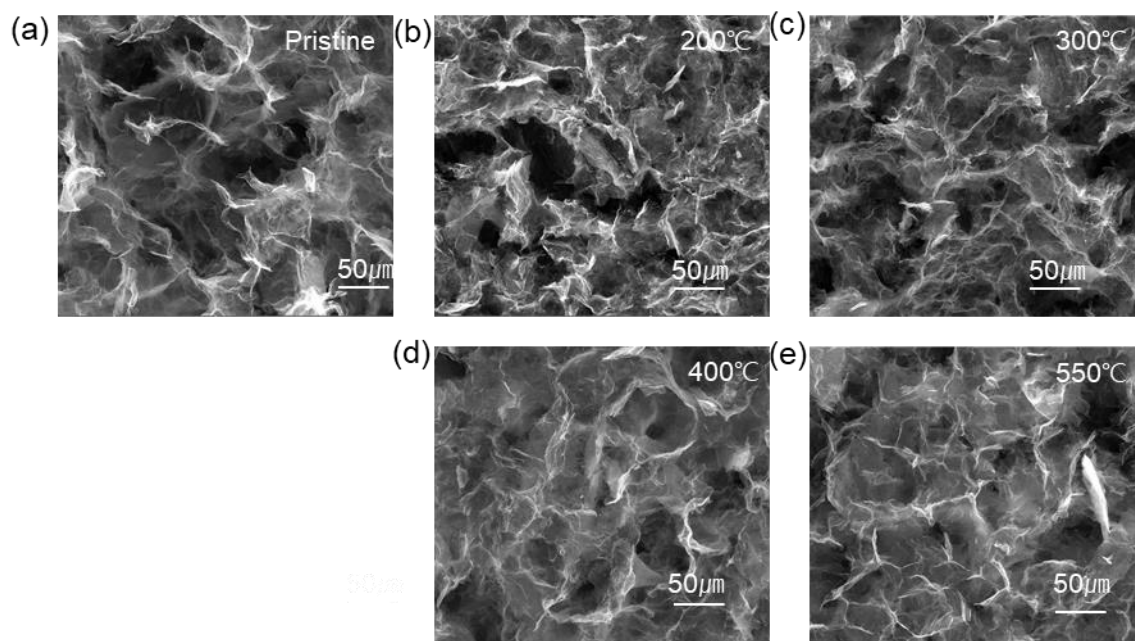

Spot 2

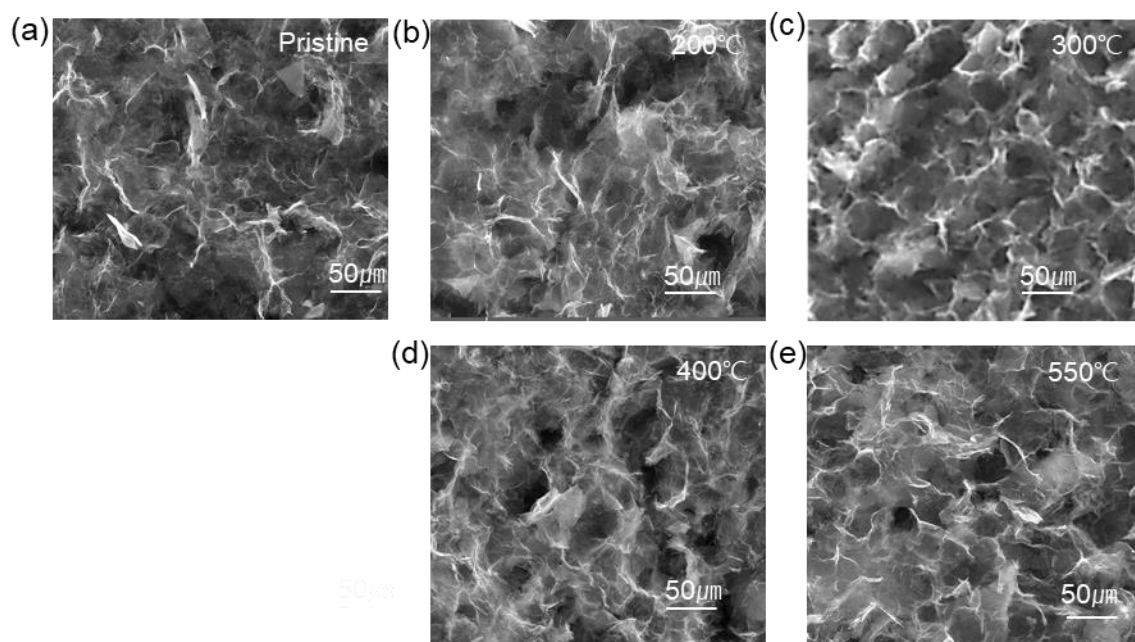

**Fig. S2.** SEM micrographs at different spots (spot 1 and spot 2) depicting the morphological understanding in SnO<sub>2</sub> aerofilm anode annealed at 200, 300, 400, and 550°C compared with no annealed anode.

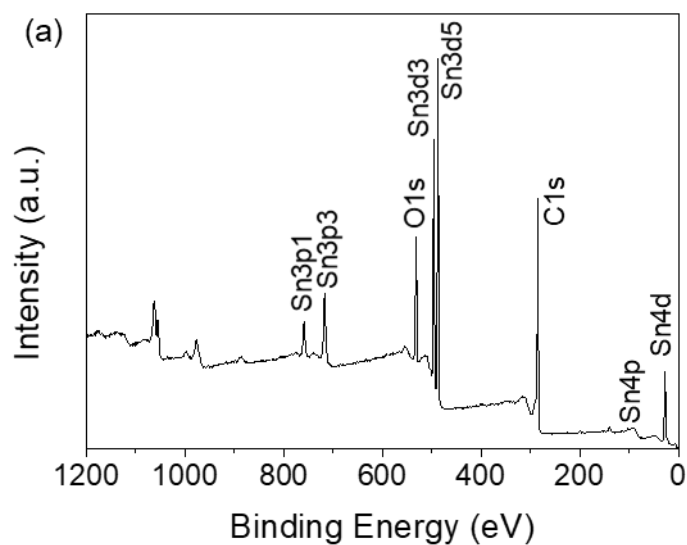

**Fig. S3.** (a) XPS survey for C-Sn bonded aerofilm anode.

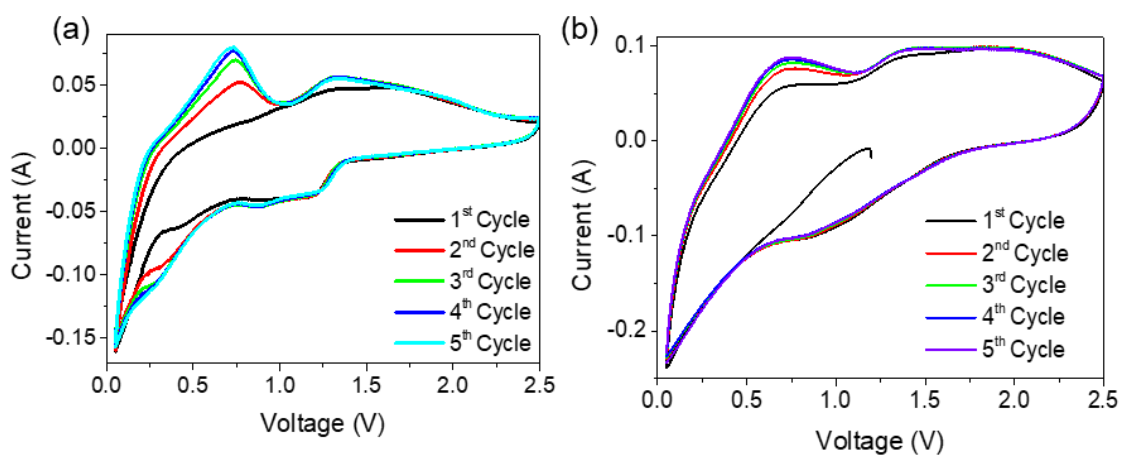

**Fig. S4.** Cyclic voltammetry curves during the initial five cycles at  $1\text{mV s}^{-1}$  (a) C-O-Sn and (b) C-Sn bonded anode.

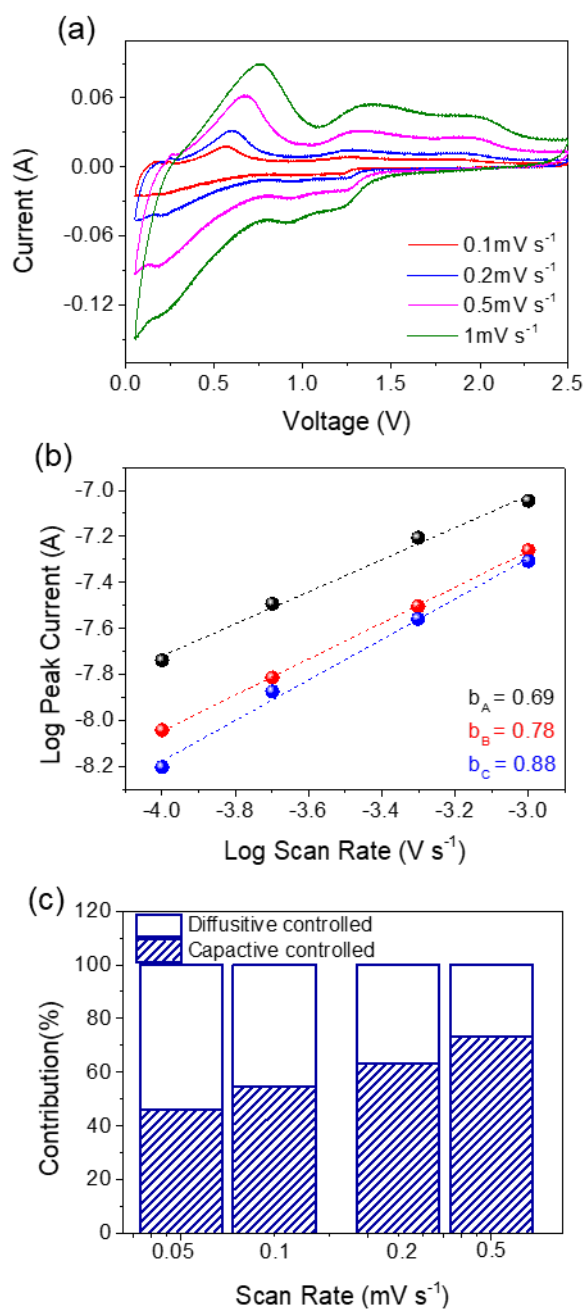

**Fig. S5.** (a) Cyclic voltammety curves of C-O-Sn bonded anode at various scan rates of 0.1, 0.2, 0.5, 1.0 mV<sup>-1</sup>. (b) b-value from (a). (c) Diffusion and capacitive controlled Li storage contribution.

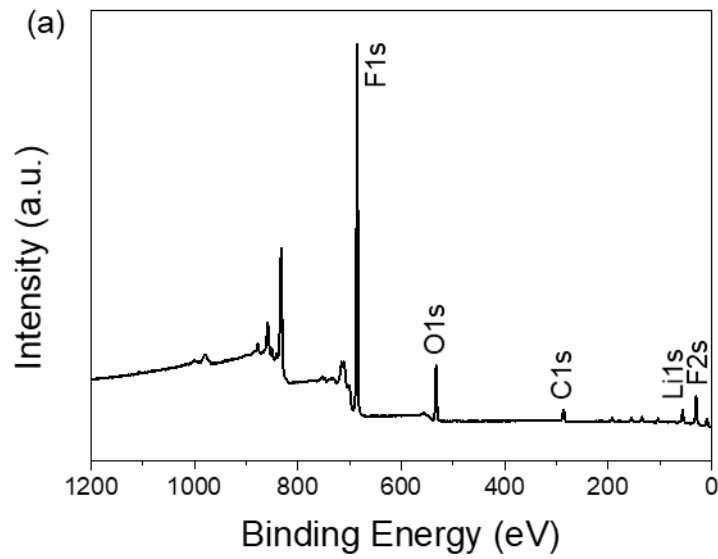

**Fig. S6.** XPS survey of cycled and lithiated C-Sn bonded aerofilm anode.

### Cell parameters

The specific capacity was calculated based on the mass of  $\text{SnO}_2$ , which is considered as the active material. The details of cell parameters are as follows,

Mass of G- $\text{SnO}_2$  : 1.56 – 2.1  $\text{mg}/\text{cm}^2$ ,

Mass of  $\text{SnO}_2$  : 1.11 g – 1.49  $\text{mg}/\text{cm}^2$ ,

Current rate : 1 C (0.79 A/g based on theoretical capacity of  $\text{SnO}_2$ ).

**Table S1.** Comparison of resistance and diffusion coefficient for C-Sn and C-O-Sn aerofilm anode on EIS.

|        | $R_s$ (k $\Omega$ ) | $R_{sei}$ (k $\Omega$ ) | $R_{ct}$ (k $\Omega$ ) | $D_{Li}$ (cm <sup>2</sup> s <sup>-1</sup> ) |
|--------|---------------------|-------------------------|------------------------|---------------------------------------------|
| C-O-Sn | 12.1                | 0.75                    | 0.36                   | 1.67E-11                                    |
| C-Sn   | 6.73                | 0.49                    | 0.153                  | 1.54E-10                                    |

**Table S2.** Electrochemical performance comparison of previously reported graphene-SnO<sub>2</sub> composite electrode for Li-ion battery.

| Electrode (Content)                                     | Synthetic method      | Voltage Window (V) | 1 <sup>st</sup> Cycle Capacity (mAh g <sup>-1</sup> ) | 2 <sup>nd</sup> Cycle Capacity (mAh g <sup>-1</sup> ) | Condition (A g <sup>-1</sup> ) | Retention rate (1 <sup>st</sup> and 2 <sup>nd</sup> Cycle) | Ref.            |
|---------------------------------------------------------|-----------------------|--------------------|-------------------------------------------------------|-------------------------------------------------------|--------------------------------|------------------------------------------------------------|-----------------|
| <b>Graphene-SnO<sub>2</sub> aerofilm</b>                | <b>Immersing</b>      | <b>0.005~2.5</b>   | <b>1183</b>                                           | <b>1158</b>                                           | <b>0.158</b>                   | <b>98%</b>                                                 | <b>Our Work</b> |
|                                                         |                       |                    | <b>958</b>                                            | <b>951</b>                                            | <b>0.790</b>                   | <b>99%</b>                                                 |                 |
| Graphene/Sn @ carbonaceous foam                         | Hydrothermal          | 0.001~3            | ~1300                                                 | ~800                                                  | 0.1                            | 62%                                                        | S1              |
| Sn@3D graphene networks                                 | Freeze drying and CVD | 0.005~3            | ~1800                                                 | ~1200                                                 | 0.2                            | 67%                                                        | S2              |
| SnO <sub>2</sub> quantum dots@GO                        | Hydrothermal          | 0.01~3             | ~1500                                                 | ~1000                                                 | 0.1                            | 67%                                                        | S3              |
| F-doped SnO <sub>2</sub> @rGO                           | Hydrothermal          | 0.01~3             | ~2000                                                 | ~1250                                                 | 0.1                            | 63%                                                        | S4              |
| SnO <sub>2</sub> /graphene                              | hydrolysis            | 0.01~2             | ~980                                                  | ~920                                                  | 0.067                          | 94%                                                        | S5              |
| SnO <sub>2</sub> /CNT-GN composite                      | Hydrothermal          | 0.01~3             | ~1800                                                 | ~1100                                                 | 0.2                            | 61%                                                        | S6              |
| 3D annealed SnO <sub>2</sub> /graphene foams            | Hydrothermal          | 0.01~3             | ~1650                                                 | ~1000                                                 | 0.2                            | 61%                                                        | S7              |
| Tin graphene tube                                       | Hydrothermal          | 0.01~2.5           | ~1300                                                 | ~900                                                  | 0.2                            | 69%                                                        | S8              |
| N-Doped Gr_SnO <sub>2</sub>                             | Solution              | 0.05~3             | ~1450                                                 | ~900                                                  | 0.05                           | 62%                                                        | S9              |
| Graphene Nanoribbon and Nanostructured SnO <sub>2</sub> | Solution refluxing    | 0.01~2.5           | ~1500                                                 | ~1110                                                 | 0.1                            | 74%                                                        | S10             |
| SnO <sub>2</sub> /RGO                                   | Hydrothermal          | 0.01~3             | ~1542                                                 | ~837                                                  | 0.5                            | 54%                                                        | S11             |

**Table S3.** Cycle stability comparison of previously reported graphene-SnO<sub>2</sub> composite electrode for Li-ion battery.

| Electrode (Content)                                     | Voltage Window (V) | Cyclability (mAh g <sup>-1</sup> )             | Rate performance (mAh g <sup>-1</sup> )                                                 | Ref.            |
|---------------------------------------------------------|--------------------|------------------------------------------------|-----------------------------------------------------------------------------------------|-----------------|
| <b>Graphene-SnO<sub>2</sub> aerofilm</b>                | <b>0.005~2.5</b>   | <b>1255 (200cycle at 158mA g<sup>-1</sup>)</b> | <b>553 (1500cycle at 0.79A g<sup>-1</sup>)</b>                                          | <b>Our Work</b> |
| Graphene/Sn@carbonaceous foam                           | 0.001~3            | 777 (100 cycles at 100 mA g <sup>-1</sup> )    | 506 (500cycle at 400 mA g <sup>-1</sup> )<br>270 (500cycle at 3200 mA g <sup>-1</sup> ) | S1              |
| Graphene/Sn @ carbonaceous foam                         | 0.005~3            | 1,089 (100cycle at 200mA g <sup>-1</sup> )     | 459 (at 5 A/g) 270 (at 10 A g <sup>-1</sup> )                                           | S2              |
| Sn@3D graphene networks                                 | 0.01~3             | 112 (100 cycles at 100 mA g <sup>-1</sup> )    | 417 (2,000 cycle at 2 A g <sup>-1</sup> )                                               | S3              |
| SnO <sub>2</sub> quantum dots@GO                        | 0.01~3             | 1,037 (150 cycles at 100 mA g <sup>-1</sup> )  | 860 (at 1 A/g) 770 (at 2 A g <sup>-1</sup> )                                            | S4              |
| F-doped SnO <sub>2</sub> @rGO                           | 0.01~2             | 840 (30 cycle at 67mA g <sup>-1</sup> )        | 590 (50cycle at 400mA g <sup>-1</sup> )<br>270 (50cycle at 1000mA g <sup>-1</sup> )     | S5              |
| SnO <sub>2</sub> /graphene                              | 0.01~3             | 809 (100cycle at 200mA g <sup>-1</sup> )       | 787 (at 500mA g <sup>-1</sup> )                                                         | S6              |
| SnO <sub>2</sub> /CNT-GN composite                      | 0.01~3             | 984.2 (at 200mA g <sup>-1</sup> )              | 533.7 (150cycle at 1A g <sup>-1</sup> )                                                 | S7              |
| 3D annealed SnO <sub>2</sub> /graphene sheet foams      | 0.01~2.5           | 916 (500cycle at 200mA g <sup>-1</sup> )       | 810 (500cycle at 0.5A g <sup>-1</sup> )                                                 | S8              |
| tin graphene tube                                       | 0.05~3             | 894 (at 50mA g <sup>-1</sup> )                 | -                                                                                       | S9              |
| N-Doped Gr_SnO <sub>2</sub>                             | 0.01~2.5           | 825 (50cycle at 100mA g <sup>-1</sup> )        | 580 (at 2A g <sup>-1</sup> )                                                            | S10             |
| Graphene Nanoribbon and Nanostructured SnO <sub>2</sub> | 0.01~3             | 708 (150cycle at 500mA g <sup>-1</sup> )       | 520 (at 1A g <sup>-1</sup> )                                                            | S11             |

**Table S4.** Comparison of SnO<sub>2</sub> aerofilm anode with commercial graphite

| Electrode (Content)         | Voltage Window (V) | Cyclability (mAh g <sup>-1</sup> )             | Rate performance (mAh g <sup>-1</sup> )        | Ref.            |
|-----------------------------|--------------------|------------------------------------------------|------------------------------------------------|-----------------|
| Commercial graphite         | 0~2                | 260 (100cycle at 200mA g <sup>-1</sup> )       | 153 (300cycle at 1A g <sup>-1</sup> )          | S12             |
| Graphene                    | 0.01-3.5           | 540 (at 50mA g <sup>-1</sup> )                 | -                                              | S13             |
| CNT                         | 0.01~3             | 460 (at 20mA g <sup>-1</sup> )                 | -                                              | S14             |
| N doping carbon             | 0.01~3             | 2053 (80cycle at 100mA g <sup>-1</sup> )       | 879 (1000cycle at 5A g <sup>-1</sup> )         | S15             |
| <b>C-Sn bonded aerofilm</b> | <b>0.005~2.5</b>   | <b>1255 (200cycle at 158mA g<sup>-1</sup>)</b> | <b>553 (1500cycle at 0.79A g<sup>-1</sup>)</b> | <b>Our Work</b> |

## References

- S1. B. Luo, T. Qiu, D. Ye, L. Wang, L. Zhi, Tin nanoparticles encapsulated in graphene backboned carbonaceous foams as high-performance anodes for lithium-ion and sodium-ion storage, *Nano Energy* 22 (2016) 232-240, <https://doi.org/10.1016/j.nanoen.2016.02.024>.
- S2. J. Qin, C. He, N. Zhao, Z. Wang, C. Shi, E.-Z. Liu, J. Li, Graphene networks anchored with Sn@ graphene as lithium ion battery anode, *ACS Nano* 8 (2014) 1728-1738, <https://doi.org/10.1021/nm406105n>.
- S3. K. Zhao, L. Zhang, R. Xia, Y. Dong, W. Xu, C. Niu, L. He, M. Yan, L. Qu, L. Mai, SnO<sub>2</sub> Quantum dots@graphene oxide as a high-rate and long-life anode material for lithium-ion batteries, *Small* 12 (2016) 588-594, <https://doi.org/10.1002/sml.201502183>.
- S4. D. Cui, Z. Zheng, X. Peng, T. Li, T. Sun, L. Yuan, Fluorine-doped SnO<sub>2</sub> nanoparticles anchored on reduced graphene oxide as a high-performance lithium ion battery anode, *J. Power Sources* 362 (2017) 20-26, <https://doi.org/10.1016/j.jpowsour.2017.07.024>.
- S5. X. Wang, X. Zhou, K. Yao, J. Zhang, Z. Liu, A SnO<sub>2</sub>/graphene composite as a high stability electrode for lithium ion batteries, *Carbon* 49 (2011) 133-139, <https://doi.org/10.1016/j.carbon.2010.08.052>.
- S6. M.-S. Wang, Z.-Q. Wang, Z.-L. Yang, Y. Huang, J. Zheng, X. Li, Carbon nanotube-graphene nanosheet conductive framework supported SnO<sub>2</sub> aerogel as a high performance anode for lithium ion battery, *Electrochim. Acta* 240 (2017) 7-15, <https://doi.org/10.1016/j.electacta.2017.04.031>.
- S7. M. Zhang, Z. Sun, T. Zhang, D. Sui, Y. Ma, Y. Chen, Excellent cycling stability with high SnO<sub>2</sub> loading on a three-dimensional graphene network for lithium ion batteries, *Carbon* 102 (2016) 32-38, <https://doi.org/10.1016/j.carbon.2016.02.032>.
- S8. A. Dhanabalan, X. Li, R. Agrawal, C. Chen, C. Wang, Fabrication and characterization of SnO<sub>2</sub>/graphene composites as high capacity anodes for Li-ion batteries, *Nanomaterials* 3 (2013) 606-614, <https://doi.org/10.3390/nano3040606>.
- S9. R. Tian, Y. Zhang, Z. Chen, H. Duan, B. Xu, Y. Guo, H. Kang, H. Li, H. Liu, The effect of annealing on a 3D SnO<sub>2</sub>/graphene foam as an advanced lithium-ion battery anode, *Sci. Rep.* 6 (2016) 1-9, <https://doi.org/10.1038/srep19195> (2016).



- S10. Z.-F. Li, Q. Liu, Y. Liu, F. Yang, L. Xin, Y. Zhou, H. Zhang, L. Stanciu, J. Xie, Facile preparation of graphene/SnO<sub>2</sub> xerogel hybrids as the anode material in Li-ion batteries, *ACS Appl. Mater. Interfaces* 7 (2015) 27087-27095, <https://doi.org/10.1021/acsami.5b05819>.
- S11. Q. Tan, Z. Kong, X. Chen, L. Zhang, X. Hu, M. Mu, H. Sun, X. Shao, X. Guan, M. Gao, Synthesis of SnO<sub>2</sub>/graphene composite anode materials for lithium-ion batteries, *App. Surf. Sci.* 485 (2019) 314-322. <https://doi.org/10.1016/j.apsusc.2019.04.225>.
- S12. J.Kim, S.M.N.Jeghan, G.Lee, Superior fast-charging capability of graphite anode via facile surface treatment for lithium-ion batteries, *Microporous Mesoporous Mater.* 305 (2020) 110325. <https://doi.org/10.1016/j.micromeso.2020.110325>.
- S13. P.Lian, X.Zhu, S.Liang, Z.Li, W.Yang, H.Wang, Large reversible capacity of high quality graphene sheets as an anode material for lithium-ion batteries, *Electrochim. Acta* 55 (2010) 3909-3914. <https://doi:10.1016/j.electacta.2010.02.025>.
- S14. A.S.Claye, J.E.Fischer, C.B.Huffman, A.G.Rinzler, R.E.Smalley, Solid-State Electrochemistry of the Li Single Wall Carbon Nanotube System, *J. Electrochem. Soc.* 147 (2000) 2845-2852.
- S15. Y.Yang, S.Jin, Z.Zhang, Z.Du, H.Liu, J.Yang, H.Xu, H.Ji, Nitrogen-Doped Hollow Carbon Nanospheres for High-Performance Li-Ion Batteries, *ACS Appl. Mater. Interfaces* 9 (2017) 14180-14186. <https://doi.org/10.1021/acsami.6b14840>.
